# Supplementary material for: CDK12 and PAK2 as novel therapeutic targets for human gastric cancer
Source: PubMed Central journal article supplement (PMC7255043; doi:10.7150/thno.46137), 2020-05-15
Supplement: thnov10p6201s1.pdf [file thnov10p6201s1.pdf]

## Supplemental figures

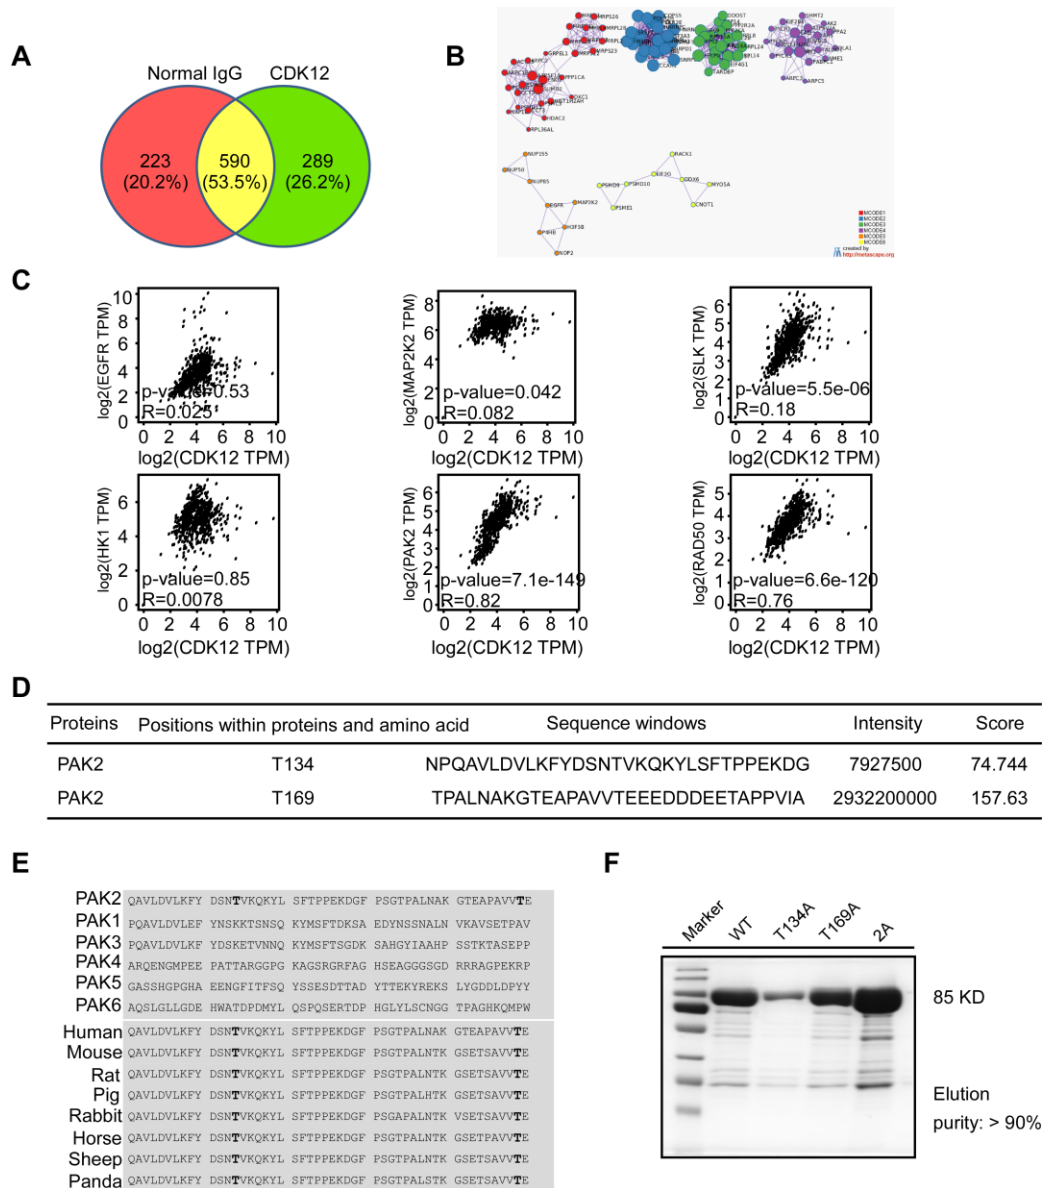

**Figure S1. CDK12 interacts with and phosphorylates PAK2**

**A.** Venn diagram (Venny 2.1) of potential CDK12 interact protein candidates (total 289). SNU-1 cell lysates were analyzed by mass spectrometry (MS/MS) after pull down assay incubated with normal rabbit IgG or anti-CDK12 antibody. The pulled-down samples were subjected to SDS-PAGE and cut into different pieces, digested with trypsin before MS/MS.

**B.** Protein-protein interaction network modes were clustered by Metascape software and the

representative modes are shown.

- C.** Potential CDK12 binding partners based on MS results analyzed on GEPIA data set.
- D.** MS/MS analysis revealed phosphorylation sites (T134/T169) of PAK2.
- E.** Sequence alignment of different PAK family members and protein sequence around the phosphorylation site motif across species.
- F.** Recombinant GST-tagged PAK2 (WT, T134A, T169A, 2A) proteins with different site mutation were purified after overexpression in *E.coli* using GST beads. The purified proteins washed in elution buffer and the purity was assessed through SDS-PAGE by Coomassie blue staining. The purity of both mutations more than 90%.

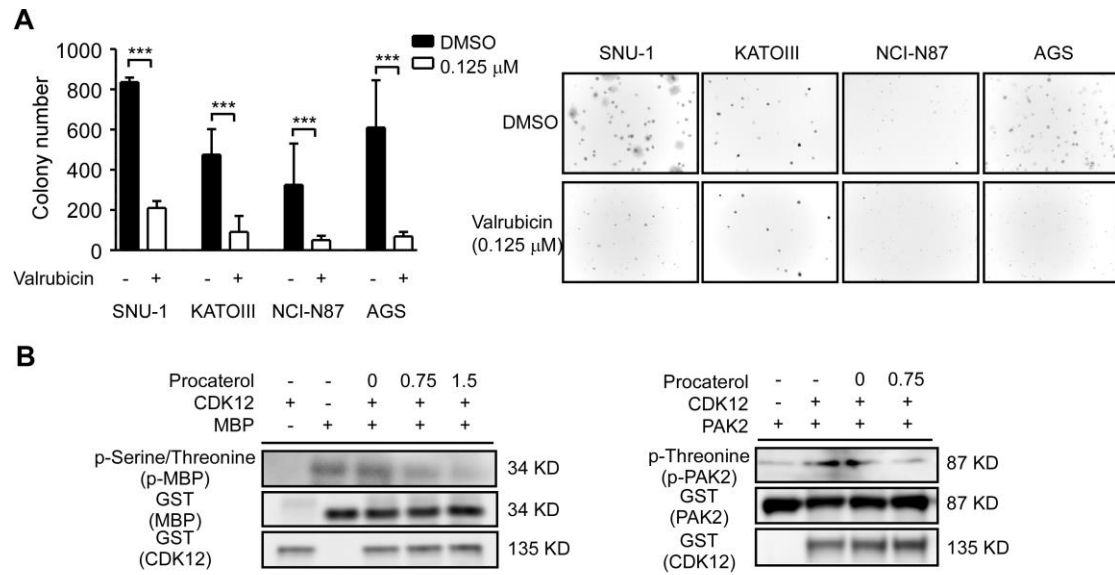

**Figure S2. Proccaterol inhibit CDK12 kinase activity**

- A. Cell viability of human gastric cancer cells treated with valrubicin (0.125  $\mu$ M) was checked by anchorage-independent colony formation assay, representative images are shown.
- B. The effect of proccaterol on CDK12 activity was evaluated in an *in vitro* kinase assay using MBP and inactive PAK2 as substrates.

**A**

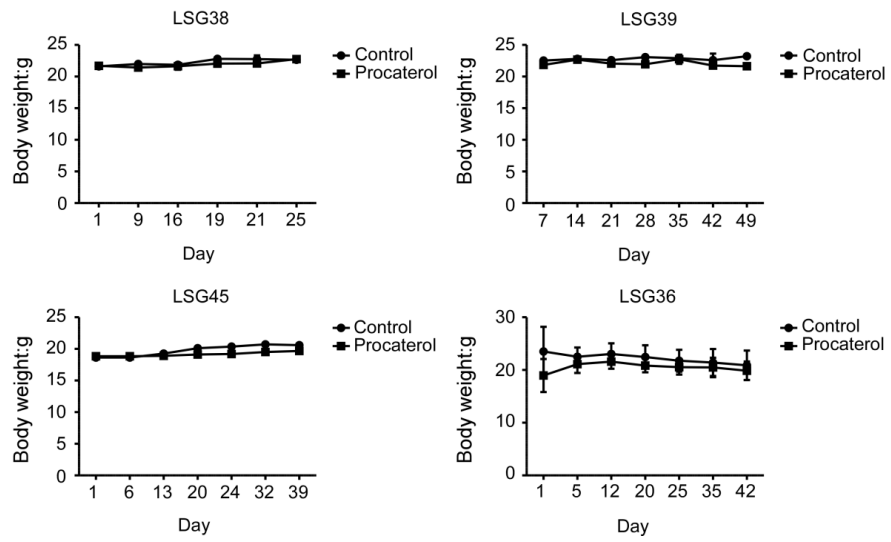

**Figure S3. Procaterol shows no significant toxicity**

A. The body weight of PDX mouse models.
